# Supplementary material for: A comparison of extended spectrum β-lactamase producing Escherichia coli from clinical, recreational water and wastewater samples associated in time and location
Source: PubMed Central journal article supplement (PMC5645111; doi:10.1371/journal.pone.0186576), 2017-10-17
Supplement: pone.0186576.s003.pdf [file pone.0186576.s003.pdf]

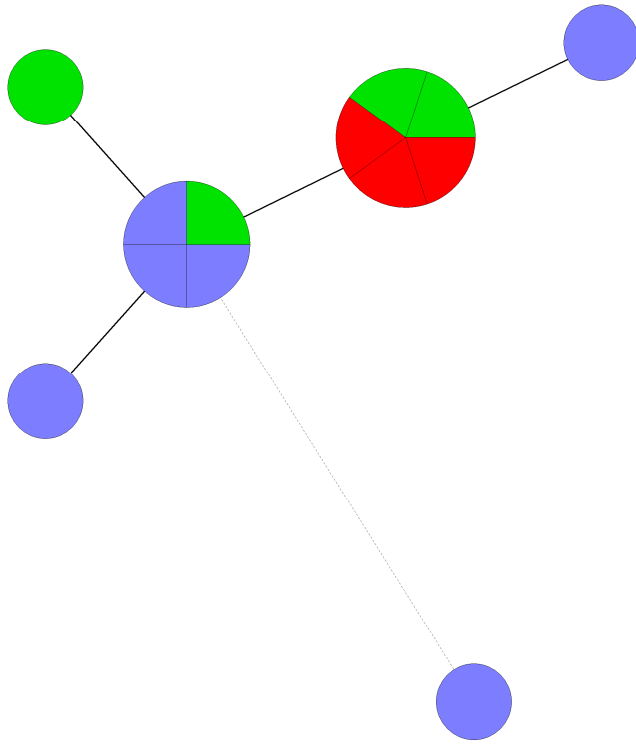

Fig S1C ST405

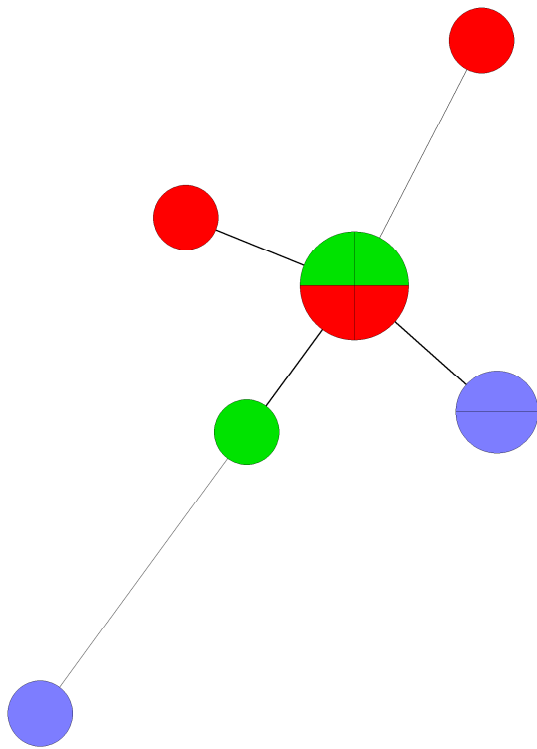

Fig S1D ST69

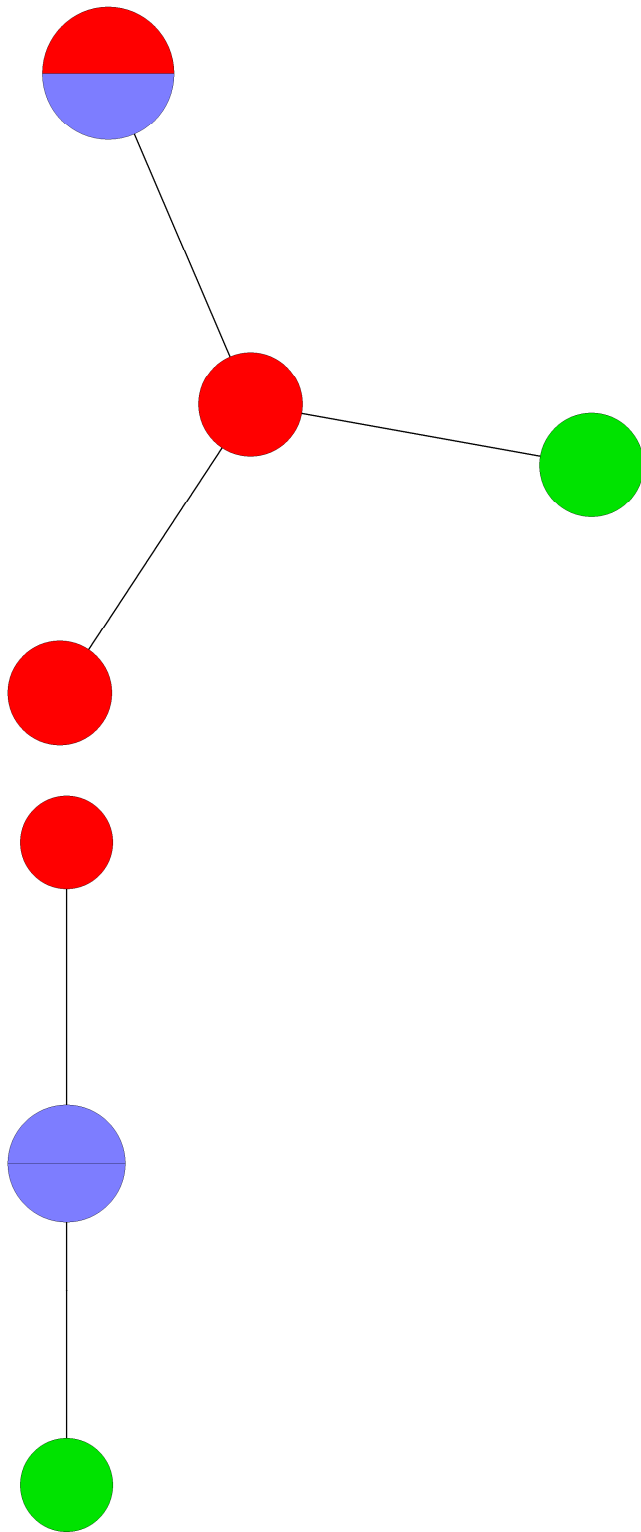

Fig S1E ST940

Fig S1 F ST410
