# Supplementary material for: A comparison of extended spectrum β-lactamase producing Escherichia coli from clinical, recreational water and wastewater samples associated in time and location
Source: PubMed Central journal article supplement (PMC5645111; doi:10.1371/journal.pone.0186576), 2017-10-17
Supplement: pone.0186576.s004.pdf [file pone.0186576.s004.pdf]

<https://cge.cbs.dtu.dk/services/>

ResFinder 2.1:

- selected threshold – 95%
- selected minimum length - 60%
- selected type of reads – Illumina paired end reads

Zankari E, Hasman H, Cosentino S, Vestergaard M, Rasmussen S, Lund O, Aarestrup FM, Larsen MV. Identification of acquired antimicrobial resistance genes. *J Antimicrob Chemother.* 2012 Jul 10.

VirulenceFinder 1.5:

- selected species - E. coli
- selected threshold for %ID – 98%
- selected minimum length - 60%
- selected type of reads – Illumina paired end reads

Joensen KG, Scheutz F, Lund O, Hasman H, Kaas RS, Nielsen EM, Aarestrup FM. Real-time whole-genome sequencing for routine typing, surveillance, and outbreak detection of verotoxigenic *Escherichia coli*. *J. Clin. Microbiol.* 2014. 52(5): 1501-1510

MLST 1.8 (MultiLocus Sequence Typing):

- selected MLST configuration - E. coli#1
- selected type of reads – Illumina paired end reads

Larsen MV, Cosentino S, Rasmussen S, Friis C, Hasman H, Marvig RL, Jelsbak L, Sicheritz-Pontén T, Ussery DW, Aarestrup FM and Lund O. Multilocus Sequence Typing of Total Genome Sequenced Bacteria. *J. Clin. Microbiol.* 2012. 50(4): 1355-1361.

### PlasmidFinder 1.3

- selected database - Plasmid – Enterobacteriaceae
- selected threshold for %ID – 98%
- selected type of reads – Illumina paired end reads

Carattoli A, Zankari E, Garcia-Fernandez A, Volby Larsen M, Lund O, Villa L, Aarestrup FM, Hasman H. PlasmidFinder and pMLST: in silico detection and typing of plasmids. *Antimicrob. Agents Chemother.* 2014. April 28th.

### CSI Phylogeny 1.1:

- Uploaded reference genome – VI-2011-01-1292
- Selected min depth at SNP positions – 10x
- Selected min relative depth at SNP positions – 10x
- Selected minimum distance between SNPs (prune) – 10bp
- Selected min SNP quality – 30
- Selected min read mapping quality – 25
- Selected min. Z-score – 1.96
- Used FastTree

Rolf S. Kaas, Pimlapas Leekitcharoenphon, Frank M. Aarestrup, Ole Lund. Solving the Problem of Comparing Whole Bacterial Genomes across Different Sequencing Platforms. *PLoS ONE* 2014; 9(8): e104984.
